# Supplementary material for: Refining Heterolobosean Taxonomy with 18S rDNA Divergence Analysis: Discovery of a Novel Genus from the Coast of Mombasa, Kenya
Source: Research Square preprint supplement (doi:10.21203/rs.3.rs-8252044/v1), 2025-12-13
Supplement: Supplementary file 1 [file 827ce601bb136800897f7279.xlsx]

## Sheet: Table_S1_Global_Default_Strict_
Default inter- and intragenera pairwise pdistances
	Orodruina_flavescens_PQ811767.1	Orodruina_uncultured_DQ504339.1	Orodruina_mombasa	Naegleria_gruberi_M18732.1	Naegleria_minor_X93224.1	Naegleria_italica_U80060.1	Naegleria_lovaniensis_U80062.1	Naegleria_fowleri_AF338423.1	Pleurostomum_sp._H4_KT210076.1	Pleurostomum_flabellatum_DQ979962.1	Tetramitus_aberdonicus_AJ224888.1	Tetramitus_jugosus_M98050.1	Tetramitus_rostratus_M98051.1	Tetramitus_waccamawensis_AF011455.1	Tetramitus_thermacidophilus_AJ621574.1	Vahlkampfia_avara_AJ224886.1	Vahlkampfia_inornata_AJ224887.1	Acrasis_helenhemmesae_GU437222.1	Acrasis_takarsan_HM114347.1	Acrasis_kona_HM114345.1	Acrasis_rosea_HM114339.1	Allovahlkampfia_sp._BA_DQ388519.1	Allovahlkampfia_sp._OSA_DQ388520.1	Neovahlkampfia_damariscottae_PQ819793	Neovahlkampfia_nana_LC126981.1	Pharyngomonas_kirbyi_HQ898857.1	Pharyngomonas_sp_ATCC_50621_22_AF011465.1	Pharyngomonas_sp._RL_JX509943.1	Pharyngomonas_turkanaensis_JX509942.1	Pharyngomonadida_sp._ATCC_50646_PQ819803
Orodruina_flavescens_PQ811767.1	0	0.2887	0.244	0.3931	0.4106	0.3955	0.4034	0.4053	0.3961	0.3967	0.4409	0.4149	0.4146	0.4141	0.4232	0.419	0.4179	0.3776	0.3761	0.3711	0.3708	0.3677	0.3695	0.335	0.3403	0.3844	0.3857	0.3742	0.387	0.4471
Orodruina'_uncultured_DQ504339.1	0.2887	0	0.201	0.3859	0.3872	0.3845	0.3938	0.3941	0.4035	0.4207	0.3964	0.3872	0.3874	0.3872	0.3924	0.398	0.3958	0.3612	0.3596	0.3524	0.3494	0.3492	0.3502	0.3189	0.331	0.3836	0.3838	0.3775	0.3871	0.4103
Orodruina'_mombasa_New_isolate	0.244	0.201	0	0.3678	0.3709	0.3663	0.3682	0.3701	0.3667	0.3802	0.3449	0.3407	0.3421	0.3421	0.346	0.3639	0.3487	0.3243	0.32	0.3233	0.3125	0.3184	0.3119	0.2915	0.2843	0.3634	0.3634	0.3543	0.3618	0.3976
Naegleria_gruberi_M18732.1	0.3931	0.3859	0.3678	0	0.0324	0.0081	0.0511	0.0526	0.2764	0.3335	0.3542	0.3387	0.3317	0.3333	0.3389	0.3354	0.3403	0.3168	0.2914	0.31	0.3037	0.2877	0.2846	0.3353	0.3734	0.3626	0.3632	0.3526	0.3591	0.3732
Naegleria_minor_X93224.1	0.4106	0.3872	0.3709	0.0324	0	0.0358	0.0546	0.0563	0.2878	0.3542	0.3561	0.3508	0.3418	0.3429	0.3438	0.3325	0.338	0.3213	0.3018	0.3147	0.3116	0.2953	0.294	0.3507	0.3831	0.3774	0.3792	0.3682	0.3647	0.3836
Naegleria_italica_U80060.1	0.3955	0.3845	0.3663	0.0081	0.0358	0	0.0532	0.0549	0.2783	0.335	0.3535	0.3408	0.3337	0.337	0.3377	0.3335	0.3403	0.3151	0.2948	0.3117	0.3058	0.2903	0.2882	0.339	0.3727	0.3644	0.3662	0.3549	0.3604	0.3722
Naegleria_lovaniensis_U80062.1	0.4034	0.3938	0.3682	0.0511	0.0546	0.0532	0	0.0092	0.2821	0.3425	0.3565	0.3441	0.3341	0.3353	0.3405	0.3363	0.3407	0.3217	0.2914	0.3076	0.3046	0.2928	0.2887	0.3469	0.379	0.3745	0.3733	0.365	0.3681	0.3812
Naegleria_fowleri_AF338423.1	0.4053	0.3941	0.3701	0.0526	0.0563	0.0549	0.0092	0	0.2832	0.3434	0.3587	0.345	0.3361	0.3373	0.342	0.3379	0.3417	0.3206	0.293	0.307	0.305	0.2927	0.2886	0.3484	0.3833	0.3713	0.3713	0.3629	0.3673	0.3781
Pleurostomum_sp._H4_KT210076.1	0.3961	0.4035	0.3667	0.2764	0.2878	0.2783	0.2821	0.2832	0	0.2182	0.3741	0.3481	0.343	0.3451	0.3563	0.3727	0.3667	0.3399	0.3245	0.332	0.3335	0.3303	0.3262	0.3515	0.3722	0.383	0.3879	0.3741	0.3832	0.403
Pleurostomum_flabellatum_DQ979962.1	0.3967	0.4207	0.3802	0.3335	0.3542	0.335	0.3425	0.3434	0.2182	0	0.4017	0.3725	0.3747	0.3767	0.3975	0.3978	0.3902	0.3661	0.3449	0.3528	0.3609	0.3574	0.356	0.3749	0.3884	0.3847	0.3872	0.3866	0.3941	0.4393
Tetramitus_aberdonicus_AJ224888.1	0.4409	0.3964	0.3449	0.3542	0.3561	0.3535	0.3565	0.3587	0.3741	0.4017	0	0.0208	0.0406	0.045	0.1193	0.2231	0.2268	0.3314	0.3196	0.3293	0.3333	0.3214	0.3225	0.3658	0.3927	0.4216	0.4237	0.4054	0.4101	0.4282
Tetramitus_jugosus_M98050.1	0.4149	0.3872	0.3407	0.3387	0.3508	0.3408	0.3441	0.345	0.3481	0.3725	0.0208	0	0.0283	0.0344	0.1058	0.2145	0.2145	0.3123	0.2981	0.3053	0.3082	0.3014	0.3019	0.3488	0.3774	0.3978	0.4013	0.3841	0.3971	0.4081
Tetramitus_rostratus_M98051.1	0.4146	0.3874	0.3421	0.3317	0.3418	0.3337	0.3341	0.3361	0.343	0.3747	0.0406	0.0283	0	0.0121	0.0994	0.2104	0.2174	0.3101	0.2931	0.3046	0.3037	0.2942	0.2937	0.3519	0.3786	0.3927	0.3955	0.3777	0.3905	0.4096
Tetramitus_waccamawensis_AF011455.1	0.4141	0.3872	0.3421	0.3333	0.3429	0.337	0.3353	0.3373	0.3451	0.3767	0.045	0.0344	0.0121	0	0.1033	0.2091	0.2215	0.3121	0.2919	0.3029	0.302	0.2925	0.291	0.3519	0.3792	0.3938	0.3962	0.379	0.3907	0.4121
Tetramitus_thermacidophilus_AJ621574.1	0.4232	0.3924	0.346	0.3389	0.3438	0.3377	0.3405	0.342	0.3563	0.3975	0.1193	0.1058	0.0994	0.1033	0	0.2176	0.2256	0.3211	0.3139	0.312	0.314	0.3069	0.3035	0.3566	0.3893	0.4103	0.4118	0.3928	0.3927	0.4207
Vahlkampfia_avara_AJ224886.1	0.419	0.398	0.3639	0.3354	0.3325	0.3335	0.3363	0.3379	0.3727	0.3978	0.2231	0.2145	0.2104	0.2091	0.2176	0	0.1822	0.3356	0.3225	0.3385	0.3217	0.3176	0.3172	0.372	0.3983	0.413	0.4184	0.3953	0.3944	0.4049
Vahlkampfia_inornata_AJ224887.1	0.4179	0.3958	0.3487	0.3403	0.338	0.3403	0.3407	0.3417	0.3667	0.3902	0.2268	0.2145	0.2174	0.2215	0.2256	0.1822	0	0.3364	0.3214	0.3369	0.3242	0.3247	0.3171	0.3715	0.3889	0.4085	0.4098	0.4	0.401	0.4022
Acrasis_helenhemmesae_GU437222.1	0.3776	0.3612	0.3243	0.3168	0.3213	0.3151	0.3217	0.3206	0.3399	0.3661	0.3314	0.3123	0.3101	0.3121	0.3211	0.3356	0.3364	0	0.2245	0.2127	0.209	0.2348	0.2307	0.3292	0.348	0.3754	0.3733	0.3744	0.3848	0.4056
Acrasis_takarsan_HM114347.1	0.3761	0.3596	0.32	0.2914	0.3018	0.2948	0.2914	0.293	0.3245	0.3449	0.3196	0.2981	0.2931	0.2919	0.3139	0.3225	0.3214	0.2245	0	0.185	0.1698	0.1977	0.185	0.3156	0.3475	0.3692	0.3677	0.3697	0.3787	0.3722
Acrasis_kona_HM114345.1	0.3711	0.3524	0.3233	0.31	0.3147	0.3117	0.3076	0.307	0.332	0.3528	0.3293	0.3053	0.3046	0.3029	0.312	0.3385	0.3369	0.2127	0.185	0	0.128	0.1603	0.1552	0.3198	0.348	0.3631	0.3622	0.3624	0.3748	0.3918
Acrasis_rosea_HM114339.1	0.3708	0.3494	0.3125	0.3037	0.3116	0.3058	0.3046	0.305	0.3335	0.3609	0.3333	0.3082	0.3037	0.302	0.314	0.3217	0.3242	0.209	0.1698	0.128	0	0.1654	0.1526	0.309	0.3487	0.3596	0.3592	0.3595	0.3702	0.3757
Allovahlkampfia_sp._BA_DQ388519.1	0.3677	0.3492	0.3184	0.2877	0.2953	0.2903	0.2928	0.2927	0.3303	0.3574	0.3214	0.3014	0.2942	0.2925	0.3069	0.3176	0.3247	0.2348	0.1977	0.1603	0.1654	0	0.0429	0.3042	0.3342	0.3778	0.3775	0.3688	0.3766	0.3798
Allovahlkampfia_sp._OSA_DQ388520.1	0.3695	0.3502	0.3119	0.2846	0.294	0.2882	0.2887	0.2886	0.3262	0.356	0.3225	0.3019	0.2937	0.291	0.3035	0.3172	0.3171	0.2307	0.185	0.1552	0.1526	0.0429	0	0.3023	0.3346	0.3736	0.3749	0.364	0.3723	0.372
Neovahlkampfia_damariscottae_PQ819793	0.335	0.3189	0.2915	0.3353	0.3507	0.339	0.3469	0.3484	0.3515	0.3749	0.3658	0.3488	0.3519	0.3519	0.3566	0.372	0.3715	0.3292	0.3156	0.3198	0.309	0.3042	0.3023	0	0.2486	0.3672	0.3638	0.3619	0.3703	0.3662
Neovahlkampfia_nana_LC126981.1	0.3403	0.331	0.2843	0.3734	0.3831	0.3727	0.379	0.3833	0.3722	0.3884	0.3927	0.3774	0.3786	0.3792	0.3893	0.3983	0.3889	0.348	0.3475	0.348	0.3487	0.3342	0.3346	0.2486	0	0.383	0.3867	0.3813	0.3909	0.4066
Pharyngomonas_kirbyi_HQ898857.1	0.3844	0.3836	0.3634	0.3626	0.3774	0.3644	0.3745	0.3713	0.383	0.3847	0.4216	0.3978	0.3927	0.3938	0.4103	0.413	0.4085	0.3754	0.3692	0.3631	0.3596	0.3778	0.3736	0.3672	0.383	0	0.0169	0.0963	0.11	0.3597
Pharyngomonas_sp_ATCC_50621_22_AF011465.1	0.3857	0.3838	0.3634	0.3632	0.3792	0.3662	0.3733	0.3713	0.3879	0.3872	0.4237	0.4013	0.3955	0.3962	0.4118	0.4184	0.4098	0.3733	0.3677	0.3622	0.3592	0.3775	0.3749	0.3638	0.3867	0.0169	0	0.0952	0.1072	0.3645
Pharyngomonas_sp._RL_JX509943.1	0.3742	0.3775	0.3543	0.3526	0.3682	0.3549	0.365	0.3629	0.3741	0.3866	0.4054	0.3841	0.3777	0.379	0.3928	0.3953	0.4	0.3744	0.3697	0.3624	0.3595	0.3688	0.364	0.3619	0.3813	0.0963	0.0952	0	0.0385	0.3665
Pharyngomonas_turkanaensis_JX509942.1	0.387	0.3871	0.3618	0.3591	0.3647	0.3604	0.3681	0.3673	0.3832	0.3941	0.4101	0.3971	0.3905	0.3907	0.3927	0.3944	0.401	0.3848	0.3787	0.3748	0.3702	0.3766	0.3723	0.3703	0.3909	0.11	0.1072	0.0385	0	0.3704
Pharyngomonadida_sp._ATCC_50646_PQ819803	0.4471	0.4103	0.3976	0.3732	0.3836	0.3722	0.3812	0.3781	0.403	0.4393	0.4282	0.4081	0.4096	0.4121	0.4207	0.4049	0.4022	0.4056	0.3722	0.3918	0.3757	0.3798	0.372	0.3662	0.4066	0.3597	0.3645	0.3665	0.3704	0
Strict inter- and intragenera pairwise pdistances
	Orodruina_flavescens_PQ811767.1	Orodruina_uncultured_DQ504339.1	Orodruina_mombasa	Naegleria_gruberi_M18732.1	Naegleria_minor_X93224.1	Naegleria_italica_U80060.1	Naegleria_lovaniensis_U80062.1	Naegleria_fowleri_AF338423.1	Pleurostomum_sp._H4_KT210076.1	Pleurostomum_flabellatum_DQ979962.1	Tetramitus_aberdonicus_AJ224888.1	Tetramitus_jugosus_M98050.1	Tetramitus_rostratus_M98051.1	Tetramitus_waccamawensis_AF011455.1	Tetramitus_thermacidophilus_AJ621574.1	Vahlkampfia_avara_AJ224886.1	Vahlkampfia_inornata_AJ224887.1	Acrasis_helenhemmesae_GU437222.1	Acrasis_takarsan_HM114347.1	Acrasis_kona_HM114345.1	Acrasis_rosea_HM114339.1	Allovahlkampfia_sp._BA_DQ388519.1	Allovahlkampfia_sp._OSA_DQ388520.1	Neovahlkampfia_damariscottae_PQ819793	Neovahlkampfia_nana_LC126981.1	Pharyngomonas_kirbyi_HQ898857.1	Pharyngomonas_sp_ATCC_50621_22_AF011465.1	Pharyngomonas_sp._RL_JX509943.1	Pharyngomonas_turkanaensis_JX509942.1	Pharyngomonadida_sp._ATCC_50646_PQ819803
Orodruina_flavescens_PQ811767.1	0	0.1942	0.1986	0.3222	0.3239	0.3204	0.3222	0.3248	0.3283	0.3327	0.3124	0.3063	0.3054	0.3027	0.3027	0.3169	0.3098	0.2992	0.2842	0.2816	0.2842	0.2701	0.2674	0.2551	0.2595	0.3142	0.3124	0.3089	0.3124	0.3222
Orodruina_uncultured_DQ504339.1	0.1942	0	0.1359	0.2957	0.293	0.2921	0.2966	0.2983	0.3107	0.3266	0.2763	0.271	0.271	0.2701	0.2665	0.2904	0.2833	0.2613	0.2515	0.2427	0.241	0.2348	0.233	0.2083	0.218	0.2948	0.2957	0.2921	0.301	0.2895
Orodruina'_mombasa_New_isolate	0.1986	0.1359	0	0.3071	0.3063	0.3054	0.3054	0.3071	0.3186	0.3274	0.2639	0.2577	0.2568	0.2577	0.2639	0.2895	0.2771	0.2533	0.2471	0.2489	0.2462	0.2445	0.2383	0.2348	0.2339	0.2992	0.2992	0.2948	0.2974	0.293
Naegleria_gruberi_M18732.1	0.3222	0.2957	0.3071	0	0.0221	0.0044	0.0256	0.0282	0.218	0.2498	0.2595	0.2498	0.2427	0.2427	0.2436	0.2462	0.2507	0.2436	0.2277	0.241	0.2339	0.2233	0.2207	0.2763	0.2895	0.2816	0.2824	0.278	0.2763	0.278
Naegleria_minor_X93224.1	0.3239	0.293	0.3063	0.0221	0	0.0238	0.0318	0.0327	0.2215	0.2586	0.2621	0.2524	0.2436	0.2427	0.2454	0.2462	0.2498	0.2392	0.2295	0.2401	0.2321	0.2224	0.2233	0.2754	0.2886	0.2807	0.2816	0.2789	0.2736	0.2789
Naegleria_italica_U80060.1	0.3204	0.2921	0.3054	0.0044	0.0238	0	0.0229	0.0256	0.2162	0.2489	0.2586	0.2489	0.2436	0.2436	0.2427	0.2471	0.2498	0.2418	0.2277	0.2401	0.2321	0.2215	0.2189	0.2745	0.2886	0.2816	0.2824	0.2763	0.278	0.2754
Naegleria_lovaniensis_U80062.1	0.3222	0.2966	0.3054	0.0256	0.0318	0.0229	0	0.0044	0.2215	0.2551	0.2586	0.2498	0.2427	0.2401	0.2445	0.2427	0.2533	0.2462	0.2268	0.2401	0.233	0.2242	0.2224	0.2736	0.2895	0.2816	0.2824	0.278	0.278	0.2789
Naegleria_fowleri_AF338423.1	0.3248	0.2983	0.3071	0.0282	0.0327	0.0256	0.0044	0	0.2215	0.2533	0.2604	0.2515	0.2445	0.2418	0.2454	0.2436	0.2542	0.2462	0.2277	0.241	0.2339	0.2251	0.2233	0.2763	0.293	0.2807	0.2816	0.278	0.278	0.2763
Pleurostomum_sp._H4_KT210076.1	0.3283	0.3107	0.3186	0.218	0.2215	0.2162	0.2215	0.2215	0	0.1659	0.2992	0.2913	0.2851	0.2851	0.2877	0.2921	0.293	0.2807	0.2674	0.2701	0.2745	0.2727	0.2648	0.2904	0.323	0.3177	0.3195	0.3116	0.3116	0.3248
Pleurostomum_flabellatum_DQ979962.1	0.3327	0.3266	0.3274	0.2498	0.2586	0.2489	0.2551	0.2533	0.1659	0	0.3071	0.2992	0.2983	0.2966	0.3027	0.3036	0.308	0.2939	0.2754	0.2851	0.2886	0.2807	0.278	0.3054	0.3169	0.323	0.3248	0.3213	0.323	0.3407
Tetramitus_aberdonicus_AJ224888.1	0.3124	0.2763	0.2639	0.2595	0.2621	0.2586	0.2586	0.2604	0.2992	0.3071	0	0.0177	0.0265	0.0274	0.0565	0.1227	0.1289	0.2286	0.2207	0.2198	0.2286	0.2021	0.1995	0.2568	0.2683	0.3142	0.3142	0.3019	0.3054	0.2966
Tetramitus_jugosus_M98050.1	0.3063	0.271	0.2577	0.2498	0.2524	0.2489	0.2498	0.2515	0.2913	0.2992	0.0177	0	0.0106	0.0141	0.0424	0.1094	0.1156	0.2224	0.2083	0.2083	0.218	0.1915	0.1889	0.2515	0.2613	0.3027	0.3027	0.2904	0.2948	0.2868
Tetramitus_rostratus_M98051.1	0.3054	0.271	0.2568	0.2427	0.2436	0.2436	0.2427	0.2445	0.2851	0.2983	0.0265	0.0106	0	0.0035	0.038	0.1033	0.1183	0.2171	0.203	0.2039	0.2136	0.1845	0.1818	0.2471	0.2577	0.2983	0.2983	0.2877	0.2895	0.2886
Tetramitus_waccamawensis_AF011455.1	0.3027	0.2701	0.2577	0.2427	0.2427	0.2436	0.2401	0.2418	0.2851	0.2966	0.0274	0.0141	0.0035	0	0.0371	0.0997	0.12	0.2162	0.2021	0.2012	0.2109	0.1818	0.1792	0.2454	0.2577	0.2992	0.2992	0.2895	0.2895	0.2895
Tetramitus_thermacidophilus_AJ621574.1	0.3027	0.2665	0.2639	0.2436	0.2454	0.2427	0.2445	0.2454	0.2877	0.3027	0.0565	0.0424	0.038	0.0371	0	0.1041	0.1218	0.2154	0.2092	0.2083	0.2065	0.1906	0.1862	0.2462	0.2674	0.3063	0.3063	0.2948	0.2921	0.2886
Vahlkampfia_avara_AJ224886.1	0.3169	0.2904	0.2895	0.2462	0.2462	0.2471	0.2427	0.2436	0.2921	0.3036	0.1227	0.1094	0.1033	0.0997	0.1041	0	0.1015	0.2348	0.2251	0.2286	0.2259	0.2092	0.2048	0.2665	0.2877	0.3001	0.301	0.2868	0.2842	0.2913
Vahlkampfia_inornata_AJ224887.1	0.3098	0.2833	0.2771	0.2507	0.2498	0.2498	0.2533	0.2542	0.293	0.308	0.1289	0.1156	0.1183	0.12	0.1218	0.1015	0	0.2357	0.2295	0.241	0.233	0.2207	0.2145	0.271	0.2842	0.3036	0.3036	0.2948	0.2948	0.2948
Acrasis_helenhemmesae_GU437222.1	0.2992	0.2613	0.2533	0.2436	0.2392	0.2418	0.2462	0.2462	0.2807	0.2939	0.2286	0.2224	0.2171	0.2162	0.2154	0.2348	0.2357	0	0.1324	0.143	0.1333	0.1403	0.1377	0.2507	0.2604	0.2939	0.2939	0.2921	0.2948	0.2939
Acrasis_takarsan_HM114347.1	0.2842	0.2515	0.2471	0.2277	0.2295	0.2277	0.2268	0.2277	0.2674	0.2754	0.2207	0.2083	0.203	0.2021	0.2092	0.2251	0.2295	0.1324	0	0.0936	0.075	0.0936	0.083	0.2286	0.2507	0.286	0.2842	0.2833	0.2868	0.263
Acrasis_kona_HM114345.1	0.2816	0.2427	0.2489	0.241	0.2401	0.2401	0.2401	0.241	0.2701	0.2851	0.2198	0.2083	0.2039	0.2012	0.2083	0.2286	0.241	0.143	0.0936	0	0.075	0.0812	0.0768	0.2295	0.2436	0.2895	0.2877	0.2807	0.2842	0.2745
Acrasis_rosea_HM114339.1	0.2842	0.241	0.2462	0.2339	0.2321	0.2321	0.233	0.2339	0.2745	0.2886	0.2286	0.218	0.2136	0.2109	0.2065	0.2259	0.233	0.1333	0.075	0.075	0	0.083	0.0768	0.2268	0.2392	0.2807	0.2789	0.2745	0.278	0.2621
Allovahlkampfia_sp._BA_DQ388519.1	0.2701	0.2348	0.2445	0.2233	0.2224	0.2215	0.2242	0.2251	0.2727	0.2807	0.2021	0.1915	0.1845	0.1818	0.1906	0.2092	0.2207	0.1403	0.0936	0.0812	0.083	0	0.0168	0.2154	0.2357	0.2842	0.2824	0.2789	0.2816	0.2604
Allovahlkampfia_sp._OSA_DQ388520.1	0.2674	0.233	0.2383	0.2207	0.2233	0.2189	0.2224	0.2233	0.2648	0.278	0.1995	0.1889	0.1818	0.1792	0.1862	0.2048	0.2145	0.1377	0.083	0.0768	0.0768	0.0168	0	0.2109	0.233	0.2798	0.278	0.2718	0.2745	0.2568
Neovahlkampfia_damariscottae_PQ819793	0.2551	0.2083	0.2348	0.2763	0.2754	0.2745	0.2736	0.2763	0.2904	0.3054	0.2568	0.2515	0.2471	0.2454	0.2462	0.2665	0.271	0.2507	0.2286	0.2295	0.2268	0.2154	0.2109	0	0.1695	0.2948	0.293	0.2913	0.293	0.2639
Neovahlkampfia_nana_LC126981.1	0.2595	0.218	0.2339	0.2895	0.2886	0.2886	0.2895	0.293	0.323	0.3169	0.2683	0.2613	0.2577	0.2577	0.2674	0.2877	0.2842	0.2604	0.2507	0.2436	0.2392	0.2357	0.233	0.1695	0	0.2983	0.2983	0.2948	0.301	0.2692
Pharyngomonas_kirbyi_HQ898857.1	0.3142	0.2948	0.2992	0.2816	0.2807	0.2816	0.2816	0.2807	0.3177	0.323	0.3142	0.3027	0.2983	0.2992	0.3063	0.3001	0.3036	0.2939	0.286	0.2895	0.2807	0.2842	0.2798	0.2948	0.2983	0	0.0018	0.053	0.06	0.2515
Pharyngomonas_sp_ATCC_50621_22_AF011465.1	0.3124	0.2957	0.2992	0.2824	0.2816	0.2824	0.2824	0.2816	0.3195	0.3248	0.3142	0.3027	0.2983	0.2992	0.3063	0.301	0.3036	0.2939	0.2842	0.2877	0.2789	0.2824	0.278	0.293	0.2983	0.0018	0	0.0521	0.0591	0.2533
Pharyngomonas_sp._RL_JX509943.1	0.3089	0.2921	0.2948	0.278	0.2789	0.2763	0.278	0.278	0.3116	0.3213	0.3019	0.2904	0.2877	0.2895	0.2948	0.2868	0.2948	0.2921	0.2833	0.2807	0.2745	0.2789	0.2718	0.2913	0.2948	0.053	0.0521	0	0.0177	0.2507
Pharyngomonas_turkanaensis_JX509942.1	0.3124	0.301	0.2974	0.2763	0.2736	0.278	0.278	0.278	0.3116	0.323	0.3054	0.2948	0.2895	0.2895	0.2921	0.2842	0.2948	0.2948	0.2868	0.2842	0.278	0.2816	0.2745	0.293	0.301	0.06	0.0591	0.0177	0	0.2515
Pharyngomonadida_sp._ATCC_50646_PQ819803	0.3222	0.2895	0.293	0.278	0.2789	0.2754	0.2789	0.2763	0.3248	0.3407	0.2966	0.2868	0.2886	0.2895	0.2886	0.2913	0.2948	0.2939	0.263	0.2745	0.2621	0.2604	0.2568	0.2639	0.2692	0.2515	0.2533	0.2507	0.2515	0
Quotes in 'Orodruina' indicates that the new isolate and uncultured sequences are only labels as Orodruina for the analaysis purposes
